# Supplementary material for: Development of a High-Throughput Low-Cost Approach for Fabricating Fully Drawn Paper-Based Analytical Devices Using Commercial Writing Tools
Source: MDPI journal article supplement (doi:10.3390/chemosensors9070178), 2021-07-13
Supplement: s1 [file s1]

## Supplementary Material

### Development of a High-Throughput Low-Cost Approach for Fabricating Fully Drawn Paper-Based Analytical Devices Using Commercial Writing Tools

Varvara Pagkali, Eleftheria Stavra, Dionysios Soulis and Anastasios Economou \*

Laboratory of Analytical Chemistry, Department of Chemistry, National and Kapodistrian University of Athens, 157 71 Athens, Greece; bpagali@yahoo.gr (V.P.); eleftheriastavra@gmail.com (E.S.); dsoulis1@gmail.com (D.S.)

\* Correspondence: aeconomou@chem.uoa.gr; Tel.: +30-210-7274298

**Citation:** Pagkali, V.; Stavra, E.; Soulis, D.; Economou, A. Development of a High-Throughput Low-Cost Approach for Fabricating Fully Drawn Paper-Based Analytical Devices Using Commercial Writing Tools. *Chemosensors* **2021**, *9*, 178. <https://doi.org/10.3390/chemosensors9070178>

Academic Editors: Emilia Witkowska Nery and Martin Jonsson-Niedziolka

Received: 11 June 2021

Accepted: 9 July 2021

Published: 13 July 2021

**Publisher's Note:** MDPI stays neutral with regard to jurisdictional claims in published maps and institutional affiliations.

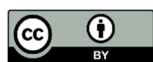

**Copyright:** © 2021 by the authors. Licensee MDPI, Basel, Switzerland. This article is an open access article distributed under the terms and conditions of the Creative Commons Attribution (CC BY) (<http://creativecommons.org/licenses/by/4.0/>).

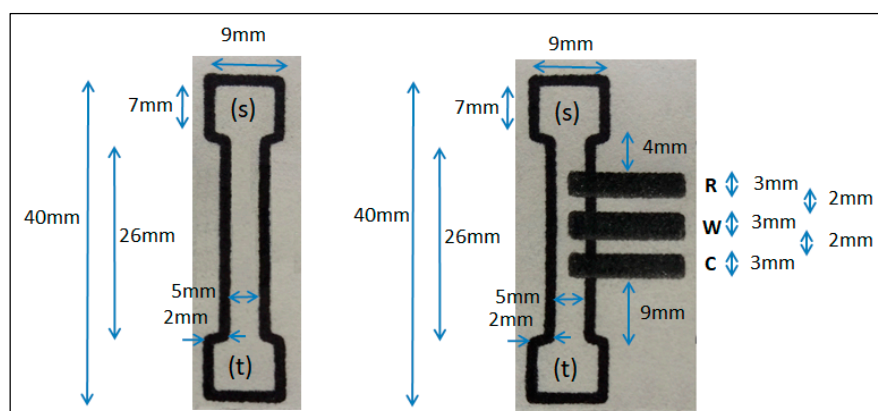

**Figure S1.** Nominal dimensions of the PADs and the electrochemical PADs fabricated in this work. R, reference electrode; W, working electrode; C counter electrode; (s), sample zone; (t), test zone.

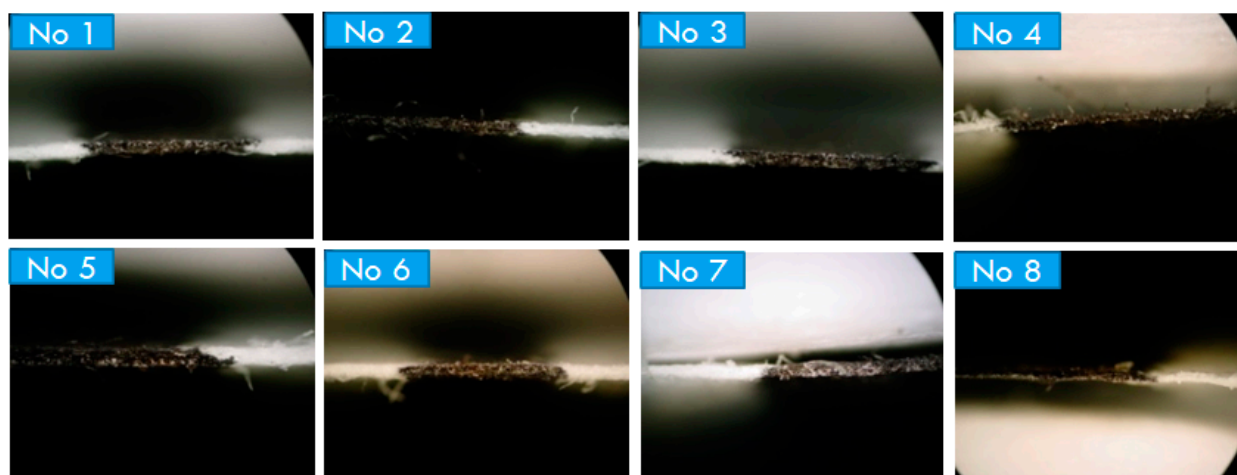

**Figure S2.** Cross-section profiles of the channels drawn with pen No 17 using single-sided plotting at the 8 paper types studied in this work (100  $\mu\text{L}$  of methylene blue; 2 passes; pen plotting speed  $2.7\text{ cm s}^{-1}$ ).

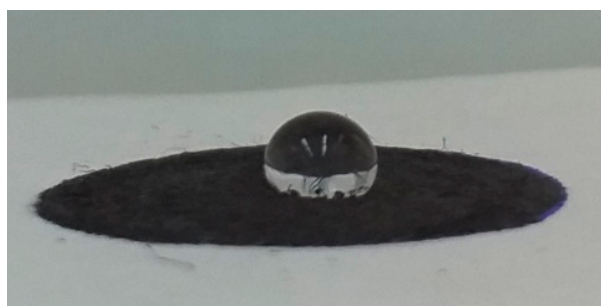

**Figure S3.** Demonstration of hydrophobicity of pen No 17 on paper No 7 (single side plotting; two passes; pen plotting speed  $3.8\text{ cm s}^{-1}$ ).

**Table S1.** Effect of the plotting speed on the barrier line width (pen No 17; paper 7; single-sided plotting; 2 passes).

| Plotting Speed ( $\text{cm s}^{-1}$ ) | Border Thickness (mm) * |
|---------------------------------------|-------------------------|
| 1.9                                   | $2.2 \pm 0.2$           |
| 2.7                                   | $1.8 \pm 0.2$           |
| 3.8                                   | $1.7 \pm 0.1$           |
| 5.7                                   | $1.6 \pm 0.1$           |
| 7.6                                   | $1.6 \pm 0.1$           |
| 9.5                                   | $1.5 \pm 0.1$           |

\* $n = 6$

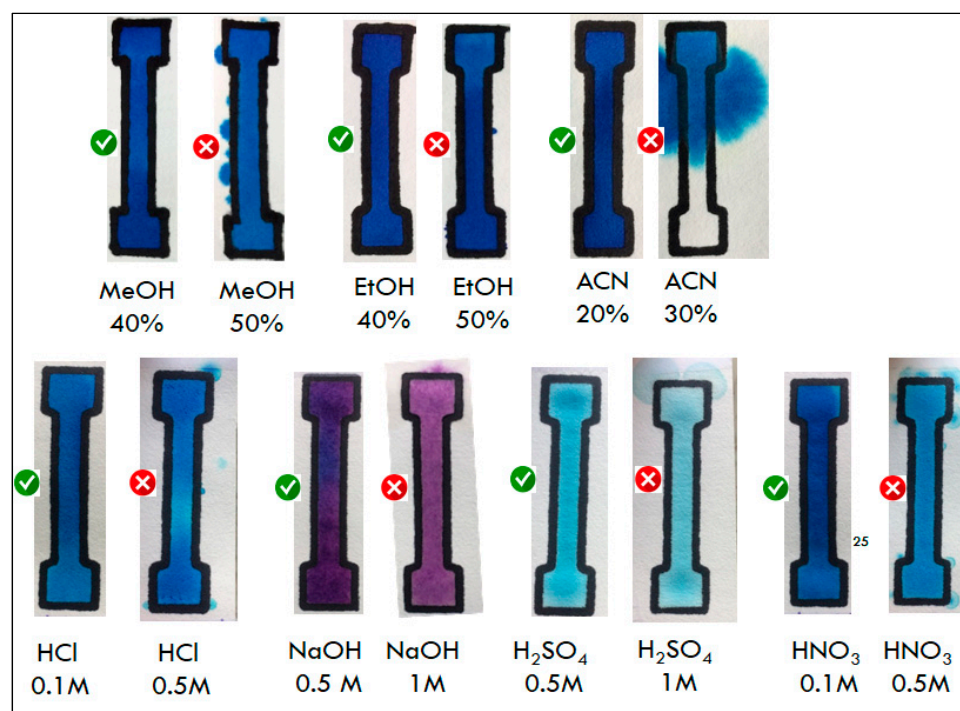

**Figure S4.** Chemical resistance of devices plotted with pen No 17 on paper No 7 (single side plotting; two passes; plotting speed 3.8 cm s<sup>-1</sup>; 100 µL of methylene blue in the respective solvent).

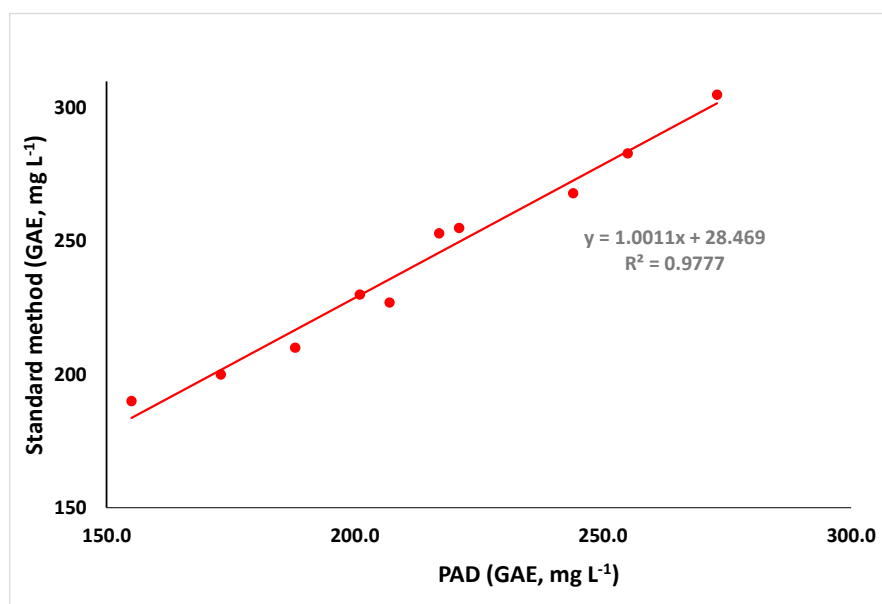

**Figure S5.** Correlation of the phenolic content (in gallic acid equivalents, GAE) measured with the PADs and the standard method [46].

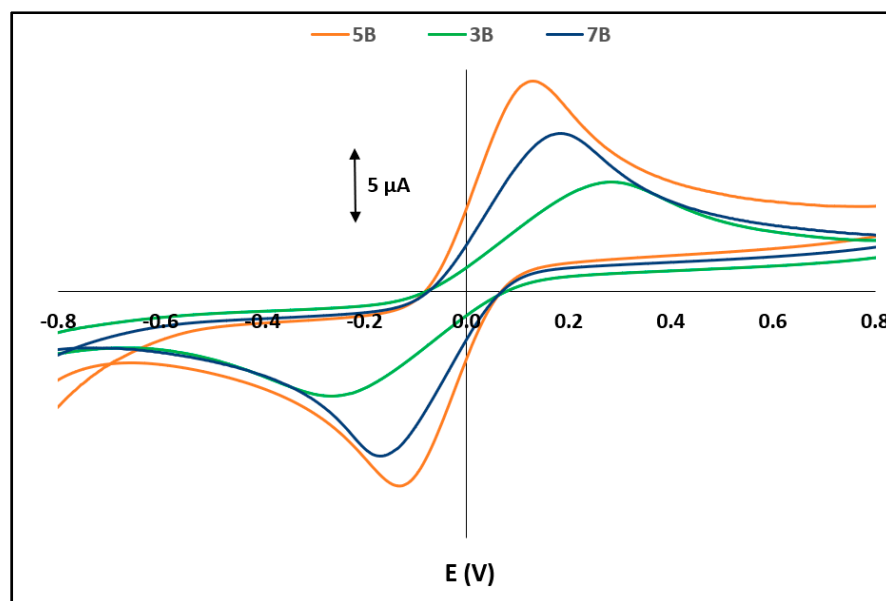

**Figure S6.** CVs of a 2.0 mmol L<sup>-1</sup> potassium ferrocyanide/ 2.0 mmol L<sup>-1</sup> potassium ferrocyanide solution in 0.01 mol L<sup>-1</sup> KCl at PADs with electrodes drawn with pencils grade 3B, 5B and 7B (pen No 17; paper 7; single-sided plotting; 2 passes; pen plotting speed 2.7 cm s<sup>-1</sup>; pencil plotting speed 32 cm s<sup>-1</sup>).
